# Supplementary material
Source: PubMed Central journal article supplement (PMC4789811)
Supplement: tobaccocontrol-2014-051638-s1.pdf [file tobaccocontrol-2014-051638-s1.pdf]

Web-Only Table 1. Comparison of Respondents Completing Wave 1 Only and Respondents Completing Both Wave 1 and Wave 2

|                            | Wave 1 Only | Both Wave 1 and 2 | p-value |
|----------------------------|-------------|-------------------|---------|
| Gender                     |             |                   | 0.38    |
| Female                     | 476         | 834               |         |
| Male                       | 469         | 762               |         |
| Race/Ethnicity             |             |                   | <0.01   |
| Non-Hispanic White         | 604         | 1173              |         |
| Non-Hispanic Black         | 93          | 100               |         |
| Hispanic                   | 138         | 164               |         |
| Non-Hispanic Other         | 110         | 159               |         |
| Sensation Seeking Quartile |             |                   | 0.03    |
| 1 <sup>st</sup> (Lowest)   | 314         | 558               |         |
| 2 <sup>nd</sup>            | 209         | 407               |         |
| 3 <sup>rd</sup>            | 201         | 328               |         |
| 4 <sup>th</sup> (Highest)  | 221         | 303               |         |
| Friends Smoke              |             |                   | <0.01   |
| No                         | 286         | 610               |         |
| Yes                        | 658         | 984               |         |
| Parents Smoke              |             |                   | <0.01   |
| Never                      | 404         | 816               |         |
| Former                     | 201         | 331               |         |
| Current                    | 310         | 413               |         |

Note: Maternal education, parental household income, and characteristics about first tobacco product (flavored, product type, and combustible) not ascertained in wave 1.

Web-Only Table 2. Comparison of Wave 1 and Wave 2 Respondents With 2011 and 2013 Current Population Survey

|                                 | Wave 1 | 2011 CPS | Wave 2 | 2013 CPS |
|---------------------------------|--------|----------|--------|----------|
| <b>Age Group at Wave 1</b>      |        |          |        |          |
| 15-17 Years Old                 | 31%    | 25%      | 37%    | 29%      |
| 18-23 Years Old                 | 69%    | 75%      | 63%    | 71%      |
| <b>Gender</b>                   |        |          |        |          |
| Female                          | 48%    | 51%      | 49%    | 51%      |
| Male                            | 52%    | 49%      | 51%    | 49%      |
| <b>Race/Ethnicity</b>           |        |          |        |          |
| Hispanic                        | 23%    | 21%      | 16%    | 21%      |
| Non-Hispanic Black              | 16%    | 15%      | 13%    | 15%      |
| Non-Hispanic Other              | 9%     | 8%       | 8%     | 8%       |
| Non-Hispanic White              | 52%    | 57%      | 63%    | 56%      |
| <b>Maternal Education Level</b> |        |          |        |          |
| <High School Graduate           | 20%    | 14%      | 13%    | 13%      |
| High School Graduate            | 23%    | 30%      | 17%    | 28%      |
| At Least Some College           | 57%    | 56%      | 70%    | 60%      |

Note: CPS=Current Population Survey.

Web-Only Table 3. Single, Dual, and Multiple Tobacco Product Use (%).

| 1 product<br>(n=241)             | 2 products<br>(n=112)                         | 3 products<br>(n=56)                                                       | 4 products<br>(n=22)                                                                     | 5 products<br>(n=11)                                                                                      | 6 products<br>(n=4)                                                                                                     | 7 products<br>(n=1)                                                                             | 8 products<br>(n=1)                                                                                            |
|----------------------------------|-----------------------------------------------|----------------------------------------------------------------------------|------------------------------------------------------------------------------------------|-----------------------------------------------------------------------------------------------------------|-------------------------------------------------------------------------------------------------------------------------|-------------------------------------------------------------------------------------------------|----------------------------------------------------------------------------------------------------------------|
| Cigarettes<br>(48.5)             | Cigarettes,<br>little filtered<br>cigars (25) | Cigarettes,<br>little filtered<br>cigars, e-<br>cigarettes<br>(12.5)       | Cigarettes,<br>little filtered<br>cigars, hookah,<br>e-cigarettes<br>(27.3)              | Cigarettes,<br>little filtered<br>cigars, medium<br>cigars,<br>large/premium<br>cigars, hookah<br>(27.3)  | Snuf, chew,<br>dip, snus, little<br>filtered cigars,<br>large/premium<br>cigars (50)                                    | Cigarettes,<br>chew, dip,<br>snus, little<br>filtered cigars,<br>hookah, e-<br>cigarettes (100) | Cigarettes,<br>snuf, chew,<br>dip, snus, little<br>filtered cigars,<br>medium cigars,<br>e-cigarettes<br>(100) |
| Hookah (22.8)                    | Cigarettes,<br>hookah (16.1)                  | Cigarettes,<br>little filtered<br>cigars, hookah<br>(8.9)                  | Cigarettes,<br>medium cigars,<br>hookah, e-<br>cigarettes (9.1)                          | little filtered<br>cigars, medium<br>cigars,<br>large/premium<br>cigars, hookah,<br>e-cigarettes<br>(9.1) | Cigarettes,<br>little filtered<br>cigars, medium<br>cigars,<br>large/premium<br>cigars, hookah,<br>e-cigarettes<br>(50) |                                                                                                 |                                                                                                                |
| Little filtered<br>cigars (16.6) | Cigarettes, e-<br>cigarettes<br>(13.4)        | Cigarettes,<br>hookah, e-<br>cigarettes (8.9)                              | Snus, little<br>filtered cigars,<br>medium cigars,<br>large/premium<br>cigars (4.5)      | Cigarettes,<br>snuf, chew,<br>dip, snus (9.1)                                                             |                                                                                                                         |                                                                                                 |                                                                                                                |
| E-cigarettes<br>(4.6)            | little filtered,<br>cigars hookah<br>(7.1)    | Cigarettes,<br>chew dip (8.9)                                              | Snuf, chew,<br>dip, snus (4.5)                                                           | Cigarettes,<br>snuf, chew,<br>dip,<br>large/premium<br>cigars (9.1)                                       |                                                                                                                         |                                                                                                 |                                                                                                                |
| Dip (2.5)                        | Cigarettes, dip<br>(7.1)                      | Cigarettes,<br>little filtered<br>cigars,<br>large/premium<br>cigars (7.1) | Little filtered<br>cigars, medium<br>cigars,<br>large/premium<br>cigars, hookah<br>(4.5) | Cigarettes,<br>little filtered<br>cigars,<br>large/premium<br>cigars, hookah,<br>e-cigarettes<br>(9.1)    |                                                                                                                         |                                                                                                 |                                                                                                                |

| 1 product<br>(n=241)   | 2 products<br>(n=112)                             | 3 products<br>(n=56)                                                   | 4 products<br>(n=22)                                                                            | 5 products<br>(n=11)                                                                                           | 6 products<br>(n=4) | 7 products<br>(n=1) | 8 products<br>(n=1) |
|------------------------|---------------------------------------------------|------------------------------------------------------------------------|-------------------------------------------------------------------------------------------------|----------------------------------------------------------------------------------------------------------------|---------------------|---------------------|---------------------|
| Medium cigars<br>(2.1) | Cigarettes,<br>large/premium<br>cigars (4.5)      | little filtered<br>cigars, hookah,<br>e-cigarettes<br>(5.4)            | Little filtered<br>cigars, medium<br>cigars,<br>large/premium<br>cigars, e-<br>cigarettes (4.5) | Cigarettes,<br>little filtered<br>cigars, medium<br>cigars,<br>large/premium<br>cigars, e-<br>cigarettes (9.1) |                     |                     |                     |
| Chew (1.2)             | Chew, dip (4.5)                                   | Cigarettes,<br>large/premium<br>cigars, hookah<br>(5.4)                | Cigarettes,<br>snuf, little<br>filtered cigars,<br>hookah (4.5)                                 | Cigarettes, dip,<br>little filtered<br>cigars, medium<br>cigars,<br>large/premium<br>cigars (9.1)              |                     |                     |                     |
| Snus (0.8)             | Little filtered<br>cigars, e-<br>cigarettes (2.7) | Cigarettes,<br>medium cigars,<br>hookah (5.4)                          | Cigarettes,<br>snuf, little<br>filtered cigars,<br>e-cigarettes<br>(4.5)                        | Cigarettes,<br>chew, dip,<br>large/premium<br>cigars, hookah<br>(9.1)                                          |                     |                     |                     |
| Snuf (0.8)             | Medium cigars,<br>hookah (2.7)                    | Snuf, chew, dip<br>(3.6)                                               | Cigarettes,<br>snuf, chew, dip<br>(4.5)                                                         | Chew, dip,<br>little filtered<br>cigars, medium<br>cigars, e-<br>cigarettes (9.1)                              |                     |                     |                     |
|                        | Cigarettes<br>medium, cigars<br>(2.7)             | Little filtered<br>cigars,<br>large/premium<br>cigars, hookah<br>(3.6) | Cigarettes,<br>little filtered<br>cigars,<br>large/premium<br>cigars, hookah<br>(4.5)           |                                                                                                                |                     |                     |                     |

Web-Only Table 4. Test of Proportional Odds/Parallel Regression Assumption

| Covariate                           | Likelihood Ratio Statistic | df | p-value |
|-------------------------------------|----------------------------|----|---------|
| Age Group                           | 0.12                       | 2  | 0.94    |
| Gender                              | 0.25                       | 1  | 0.62    |
| Race/Ethnicity                      | 0.08                       | 3  | 0.99    |
| Sensation Seeking Quartile          | 0.08                       | 3  | 0.99    |
| Friends' Smoking Status             | 0.06                       | 1  | 0.80    |
| Parental Smoking Status             | 0.38                       | 2  | 0.83    |
| Maternal Education                  | 2.21                       | 2  | 0.33    |
| Age at First Tobacco Use            | 1.39                       | 1  | 0.24    |
| First Tobacco Flavored              | 0.35                       | 1  | 0.55    |
| First Tobacco Combustible           | 1.94                       | 1  | 0.16    |
| First Tobacco Other Tobacco Product | 0.08                       | 1  | 0.78    |

Note: df=degrees of freedom.
